# Supplementary material for: PAK4 phosphorylates cyclin-dependent kinase 2 to promote the G1/S transition during adipogenesis
Source: Springer Nature journal article supplement (doi:10.1038/s12276-025-01525-x), 2025-09-30
Supplement: MOESM1 [file 12276_2025_1525_MOESM1_ESM.pdf]

## Supplementary Figures

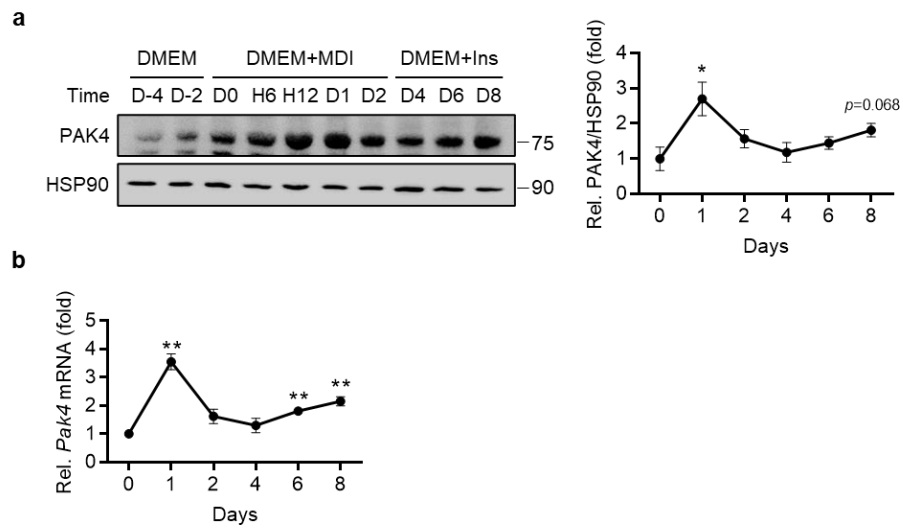

### Supplementary Figure 1. PAK4 expression changes during various stages of adipogenesis

**in 3T3-L1 cells. a.** Protein levels of PAK4 in 3T3-L1 cells induced to differentiate with MDI or insulin (Ins, 10  $\mu$ g/ml) for the specified time periods were analyzed by Western blotting, with protein density quantified ( $n = 4$ ). **b.** Quantitative was performed to assess *Pak4* mRNA levels following MDI treatment at the indicated time points ( $n = 4$ ). Values are mean  $\pm$  SD. \*,  $p < 0.05$ .

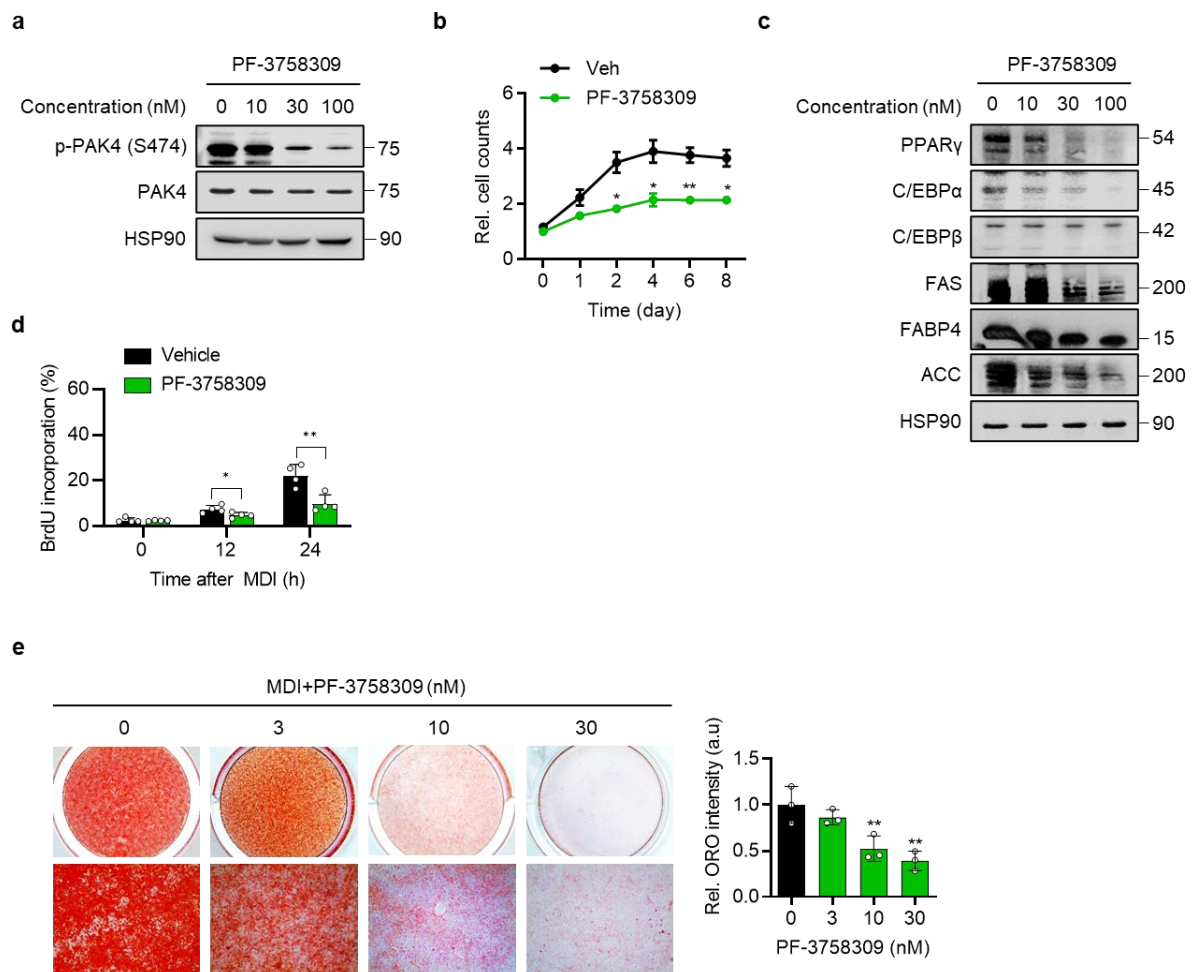

### Supplementary Figure 2. Inhibition of adipogenesis by the PAK4 inhibitor PF-3758309.

**a-c.** 3T3-L1 preadipocytes were treated with various concentrations of PF-3758309 for 24 h (a) or 8 days (c) or 10 nM PF-3758309 for different time periods (b), and the effects on PAK4 suppression, cell proliferation, and adipogenesis marker protein levels were evaluated. **d.** 3T3-L1 preadipocytes were treated with MDI for 12 or 24 h with or without 10 nM PF-3758309, and the percentage of BrdU incorporation was measured ( $n = 4$ ) was determined. **e.** After 8 days of differentiation, representative images from each group were captured following Oil Red O staining to assess lipid accumulation. Values are mean  $\pm$  SD. \*,  $p < 0.05$  and \*\*,  $p < 0.01$ .

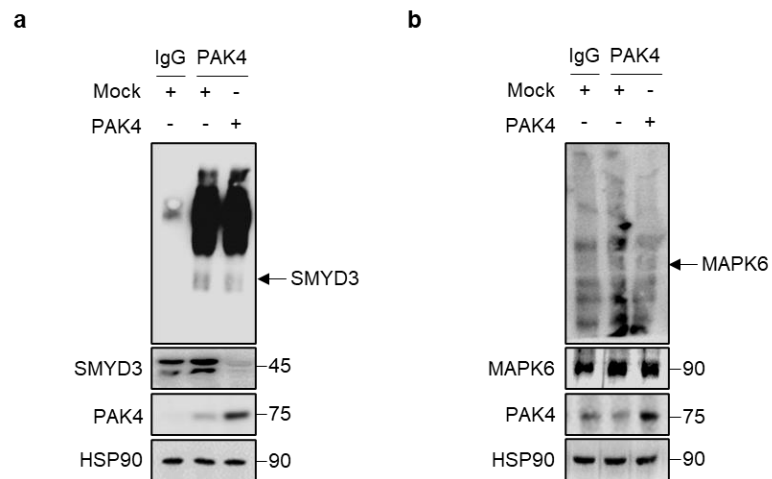

**Supplementary Figure 3. No interaction between PAK4 and either SMYD3 or MAPK5.**

**a. b.** Following transfection of 3T3-L1 preadipocytes as indicated, co-IP was conducted to assess the physical interactions between PAK4 and SMYD3 (a) and between PAK4 and MAPK6 (b).
